# Supplementary material
Source: PubMed Central journal article supplement (PMC7202689)

Figure S1

1  
2  
3  
4  
5  
6  
7  
8  
9  
10  
11  
12  
13  
14  
15  
16  
17  
18  
19  
20  
21  
22  
23  
24  
25  
26  
27  
28  
29  
30  
31  
32  
33  
34  
35  
36  
37  
38  
39  
40  
41

**a**

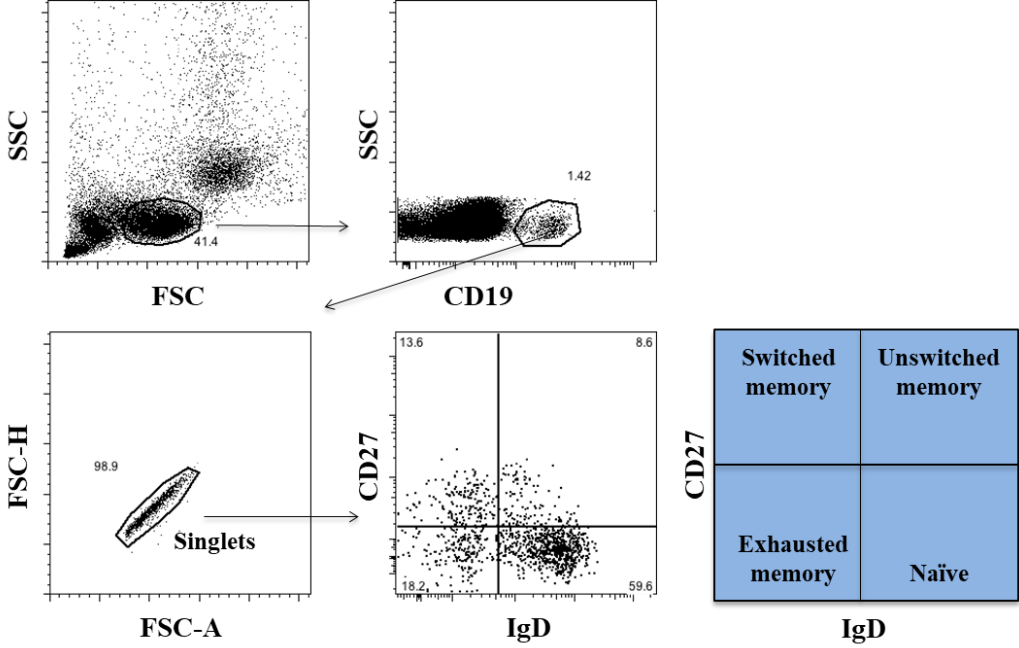

**b**

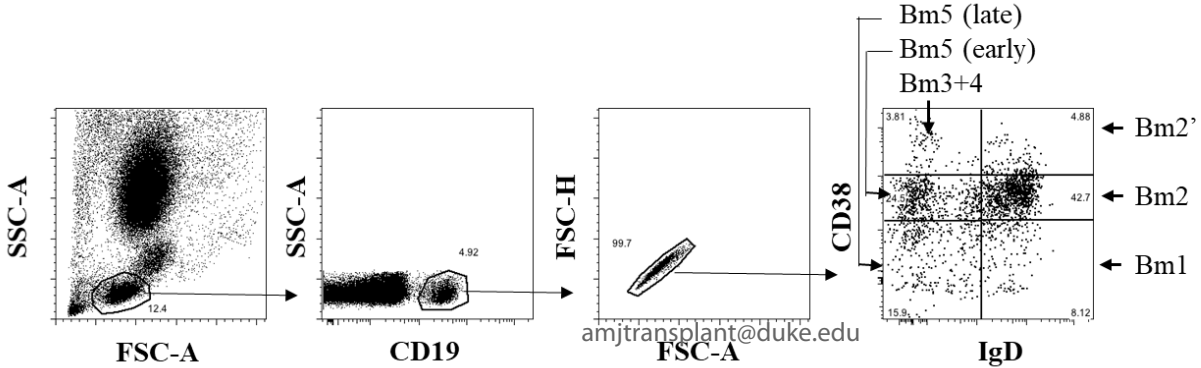

amjtransplant@duke.edu

Figure S2

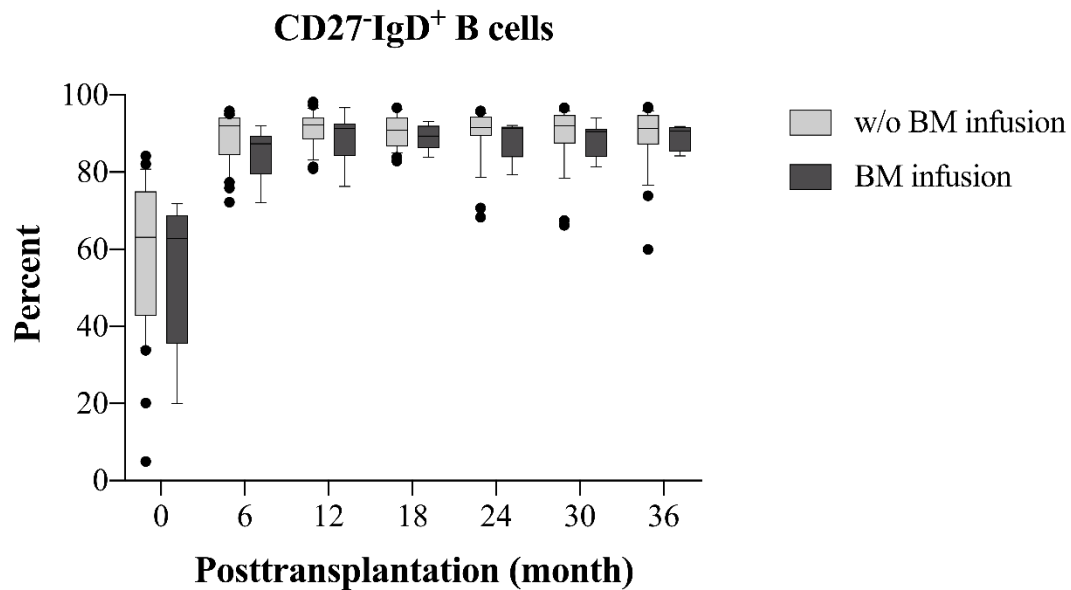

1 Figure S3  
2  
3  
4  
5  
6  
7

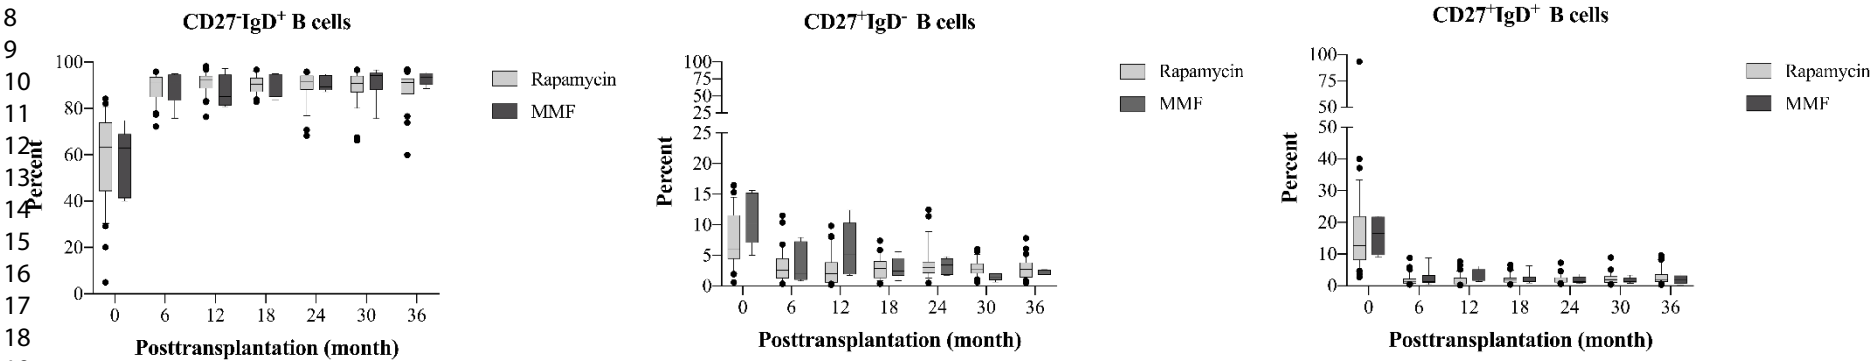

Figure S4

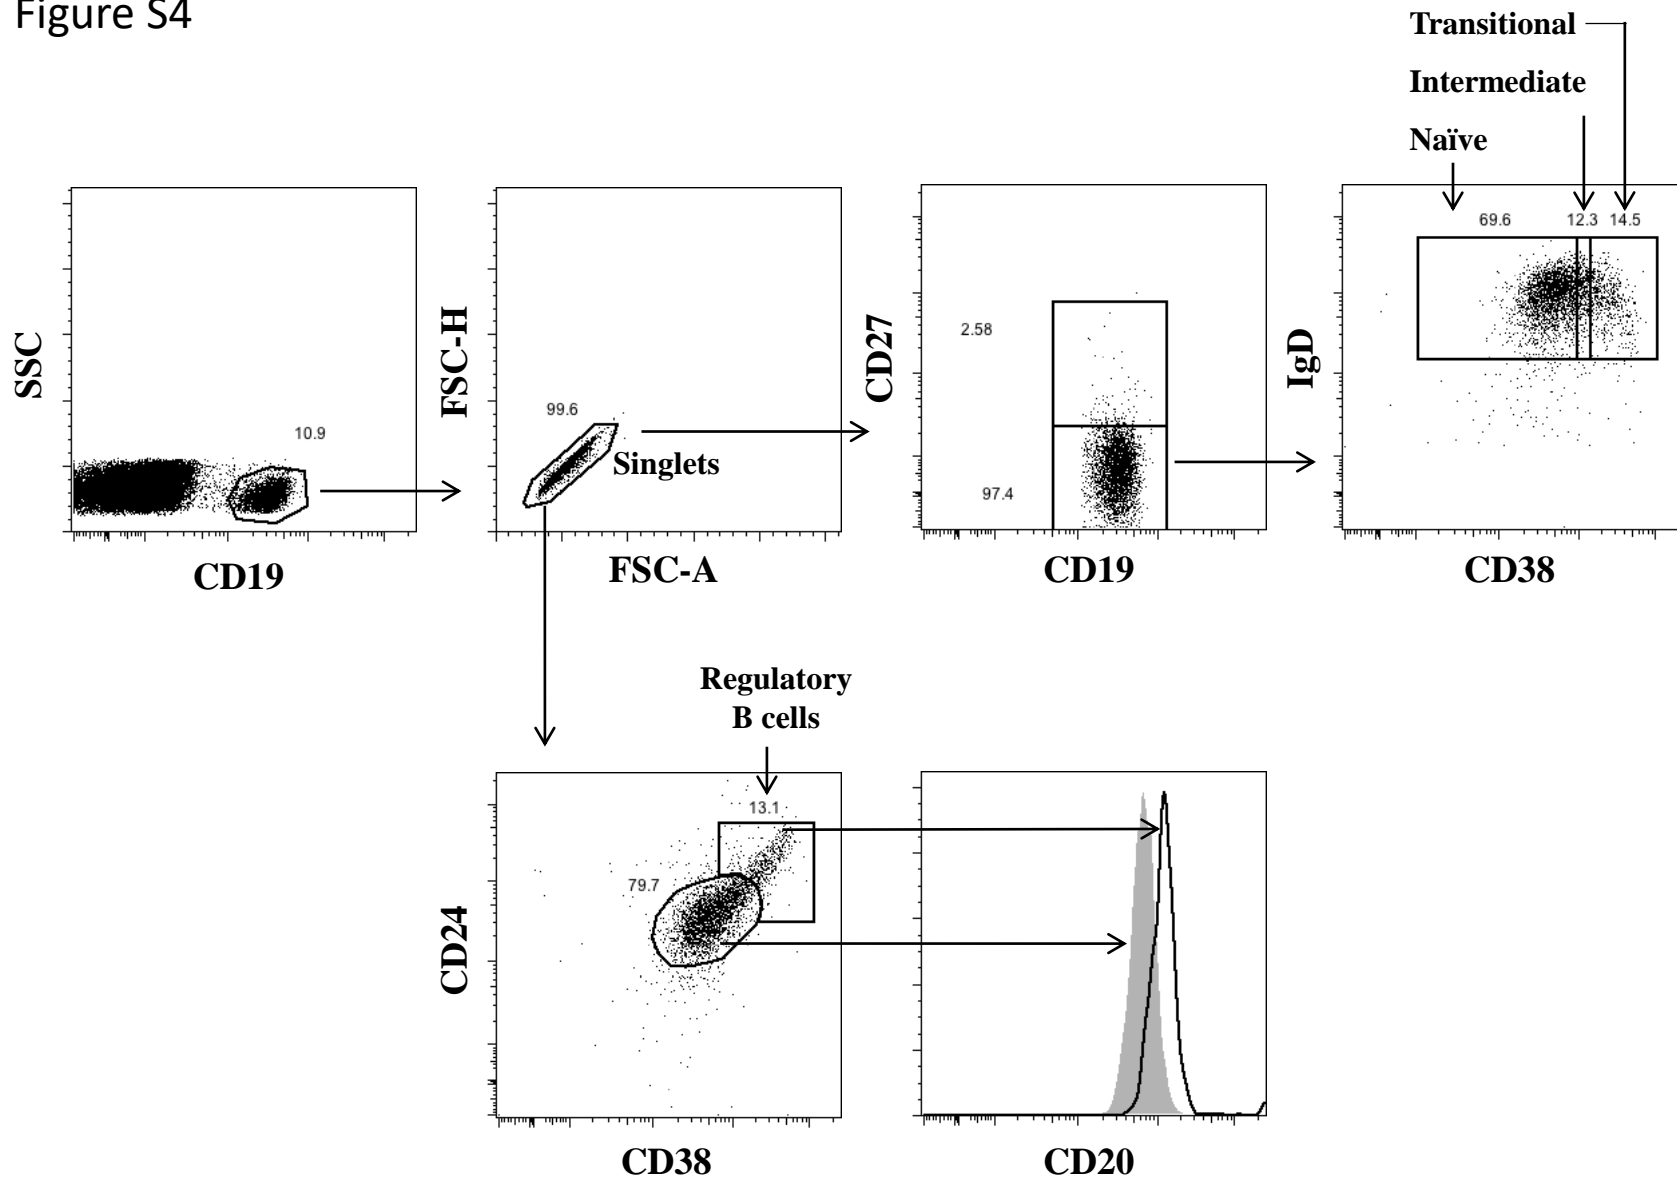

Figure S5

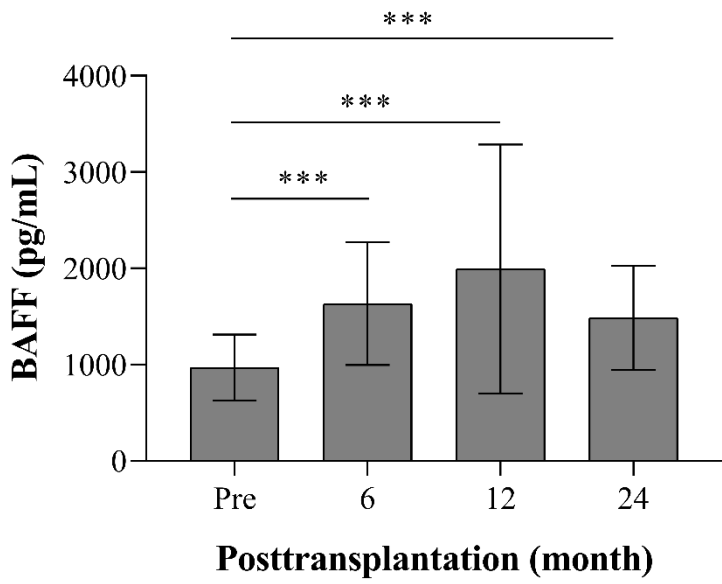

Figure S6

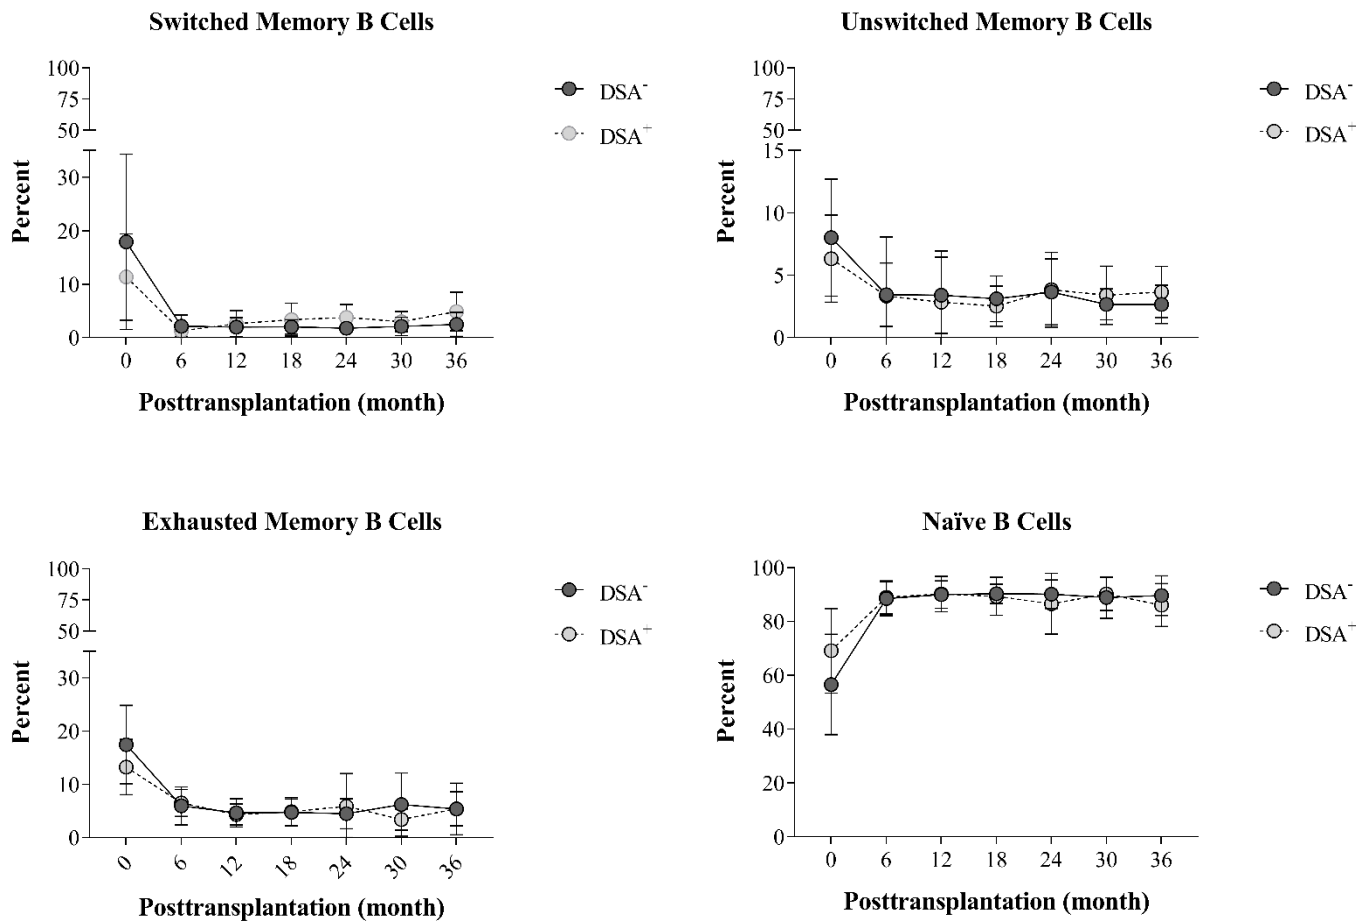

1  
2  
3  
4  
5  
6  
7  
8  
9  
10  
11  
12  
13  
14  
15  
16  
17  
18  
19  
20  
21  
22  
23  
24  
25  
26  
27  
28  
29  
30  
31  
32  
33  
34  
35  
36  
37  
38  
39  
40  
41

Supplement: NIHMS1571731-supplement-Figures_S1-S6.pdf [file NIHMS1571731-supplement-Figures_S1-S6.pdf]
